# Supplementary material for: Correlation between the expression of metastatic tumor antigen 1 splice variants and aggressive features of colorectal cancer
Source: Research Square preprint supplement (doi:10.21203/rs.3.rs-7969946/v1), 2025-11-17
Supplement: Supplementary file 1 [file 4f7086e0ead971a7d7b6d723.docx]

| Target Gene | Sequence |
| --- | --- |
| MTA1-SE-exon4-F | CATCTCCAGCACCCTCATC |
| MTA1-SE-exon4-R | TTAGTTTCTCGGGCAGGTC |
| MTA1-18-SE-F | CAAGCGCAGCTACGAGCAGC |
| MTA1-18-SE-R | GGTAGGACTTCCCGTTGAGC |
| MTA1-total-qF | TTTTCTCCCGTGGAAGTCGC |
| MTA1-total--qR | TGGTTCGGATTTGGCTTGTTAT |

Supplementary Table1 MTA1 Primer sequence
