# Supplementary material for: Correlation between the expression of metastatic tumor antigen 1 splice variants and aggressive features of colorectal cancer
Source: Research Square preprint supplement (doi:10.21203/rs.3.rs-7969946/v1), 2025-11-17
Supplement: Supplementary file 2 [file d98a0362602743b207d01576.docx]

**S Table2** **MTA1 partially correlated genes downloaded from UALCAN database to analyze potential molecular mechanism**

| Gene name | Pearson CC | P value |
| --- | --- | --- |
| BRF1 | 0.781 | 8.00E-95 |
| PACS2 | 0.762 | 1.16E-87 |
| XRCC3 | 0.685 | 1.90E-64 |
| AKT1 | 0.684 | 3.59E-64 |
| AP1G2 | 0.659 | 5.04E-58 |
| SUPT16H | 0.64 | 3.23E-06 |
| CPSF1 | 0.632 | 3.38E-52 |
| SDR39U1 | 0.616 | 6.33E-49 |
| BTBD2 | 0.605 | 8.87E-47 |
| FBRSL1 | 0.602 | 2.87E-46 |
| TRMT61A | 0.593 | 1.00E-44 |
| CAD | 0.585 | 3.76E-43 |
| AZI1 | 0.58 | 2.15E-03 |
| DDX51 | 0.579 | 3.90E-42 |
| GTPBP3 | 0.57 | 1.02E-40 |
| DGKZ | 0.568 | 3.12E-40 |
| UBE2O | 0.555 | 2.92E-38 |
| ZNF777 | 0.543 | 2.12E-36 |
| ING5 | 0.534 | 5.02E-35 |
| EHMT2 | 0.534 | 6.46E-35 |
| NGDN | 0.53 | 6.36E-10 |
| TRMT5 | 0.53 | 6.22E-07 |
| METTL3 | 0.52 | 5.97E-33 |
| CHERP | 0.516 | 2.38E-32 |
| SMARCA4 | 0.514 | 3.60E-32 |
| AKAP8L | 0.514 | 4.79E-32 |
| TUT1 | 0.512 | 8.70E-32 |
| KRI1 | 0.508 | 2.97E-31 |
| LMNB2 | 0.507 | 4.06E-31 |
| PABPN1 | 0.492 | 4.13E-29 |
| ILF3 | 0.491 | 5.08E-29 |
| ZNF839 | 0.484 | 3.98E-28 |
| MEN1 | 0.479 | 1.57E-27 |
| ACIN1 | 0.477 | 2.76E-27 |
| TNPO2 | 0.472 | 9.98E-27 |
| PTBP1 | 0.47 | 2.09E-26 |
| GIT1 | 0.459 | 4.31E-25 |
| FBF1 | 0.458 | 4.92E-25 |
| AHSA1 | 0.457 | 6.83E-25 |
| MARK3 | 0.434 | 2.57E-22 |
| DBF4B | 0.429 | 7.46E-22 |
| SNRNP200 | 0.42 | 6.00E-21 |
| MTHFD1 | 0.417 | 1.39E-20 |
| ANGEL1 | 0.411 | 5.65E-20 |
| DCAF4 | 0.399 | 7.69E-29 |
| WRNIP1 | 0.399 | 8.17E-19 |
| PARP2 | 0.372 | 1.91E-16 |
| NEK9 | 0.362 | 1.34E-15 |
| TDP1 | 0.346 | 3.09E-14 |
| SMAD6 | 0.345 | 3.36E-14 |
| TTLL5 | 0.336 | 1.73E-13 |
| PRR3 | 0.309 | 1.48E-11 |
| TGFβ1 | 0.253 | 5.94E-04 |
|  |  |  |
| HIGD1A | -0.39 | 5.53E-18 |
| RNF14 | -0.384 | 1.93E-17 |
| UBE2B | -0.375 | 1.10E-16 |
| YIPF5 | -0.37 | 3.15E-16 |
| SAR1B | -0.366 | 7.17E-16 |
| GLRX | -0.359 | 2.51E-15 |
| NDFIP1 | -0.346 | 2.68E-14 |
| TMBIM4 | -0.334 | 2.38E-13 |
| HIGD1A | -0.39 | 5.53E-18 |
| RNF14 | -0.384 | 1.93E-17 |
| SKP1 | -0.327 | 7.58E-13 |
| ARPC5 | -0.326 | 1.02E-12 |
| CD164 | -0.326 | 9.75E-13 |
| ZCCHC10 | -0.32 | 2.65E-12 |
| ARL1 | -0.318 | 3.37E-12 |
|  |  |  |
